# Supplementary material for: The role of NaF post-deposition treatment on the photovoltaic characteristics of semitransparent ultrathin Cu(In,Ga)Se2 solar cells prepared on indium-tin-oxide back contacts: a comparative study
Source: Royal Society of Chemistry journal article supplement (doi:10.1039/c9ta06274b), 2019-01-01
Supplement: c9ta06274b1.pdf [file c9ta06274b1.pdf]

## Supporting information

### The Role of NaF Post-Deposition Treatment on the Photovoltaic Characteristics of Ultrathin Cu(In,Ga)Se<sub>2</sub> Solar Cells Prepared on Indium-Tin-Oxide Back Contact: A Comparative Study

Muhammad Saifullah<sup>a,b,c</sup>, Dongryeol Kim<sup>a,d</sup>, Jun-sik Cho<sup>a,c</sup>, Seungkyu Ahn<sup>a</sup>,  
SeJin Ahn<sup>a,c</sup>, Jae Ho Yun<sup>a,c</sup>, Ho Seong Lee<sup>d</sup>, Joo Hyung Park<sup>\*a</sup>

<sup>a</sup>Photovoltaics Laboratory, Korea Institute of Energy Research (KIER), Daejeon, South Korea

<sup>b</sup>Chemistry Division, Pakistan Institute of Nuclear Science and Technology (PINSTECH), Nilore, Islamabad, Pakistan

<sup>c</sup>University of Science and Technology (UST), Daejeon, South Korea

<sup>d</sup>School of Materials Science and Engineering, Kyungpook National University, Daegu, South Korea

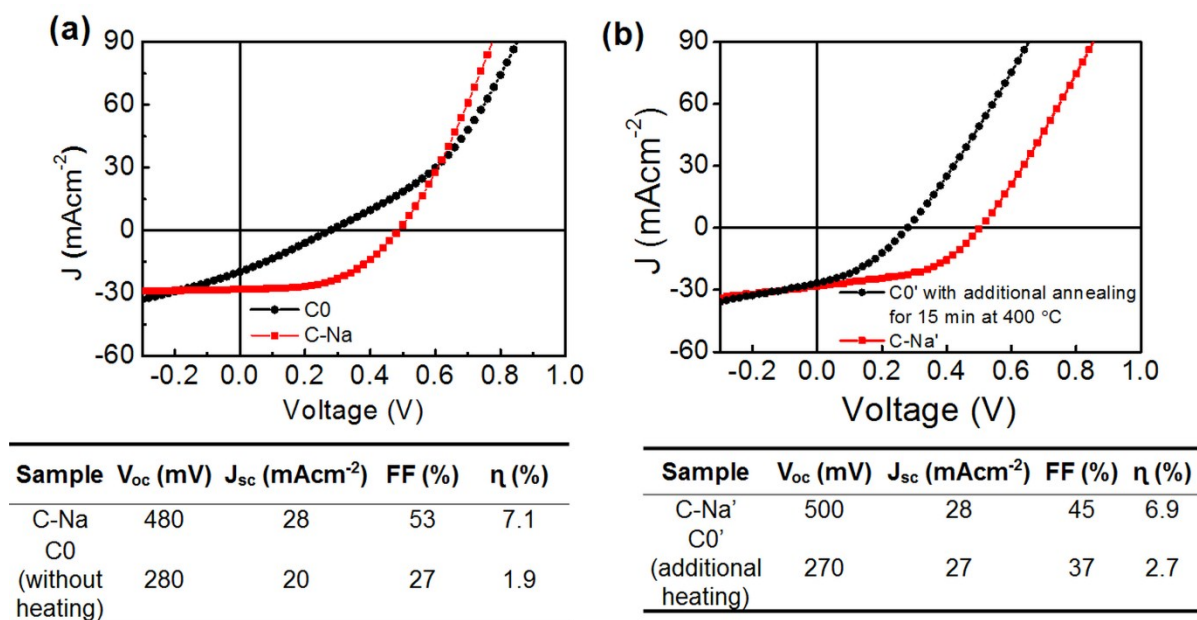

Fig. S1. Comparison of PV properties of (a) C0 without additional annealing and (b) C0' with additional annealing at 400 °C (corresponding PV parameters are given in the tables below figures).

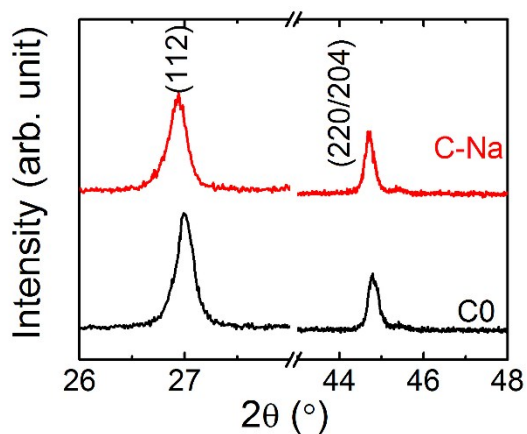

Fig. S2.  $2\theta$ - $\theta$  XRD scans of C0 and C-Na prepared on an ITO BC (XRD peak position reflected in figure are in accordance with the peaks of  $\text{Cu}(\text{In}_{0.7}\text{Ga}_{0.3})\text{Se}_2$  (ICDD-PDF No. 00-035-1102)).

(a)

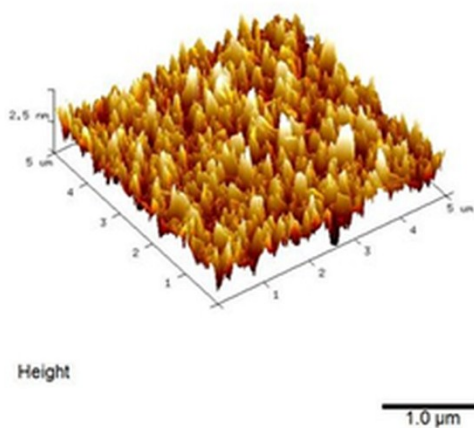

(b)

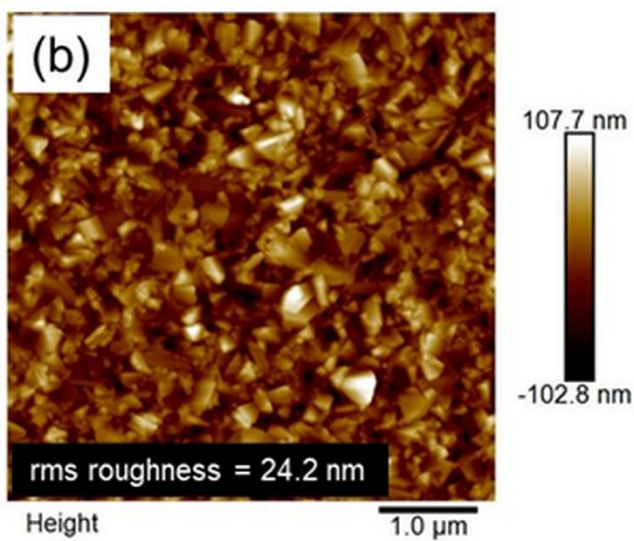

(c)

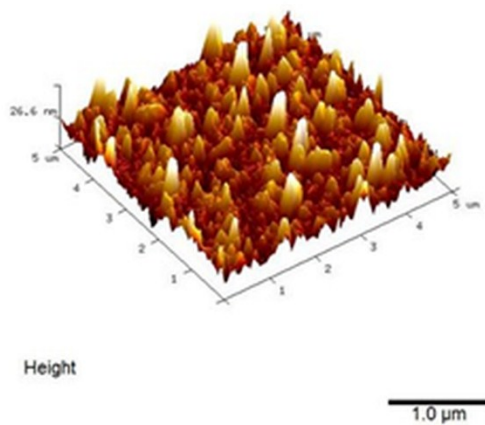

(d)

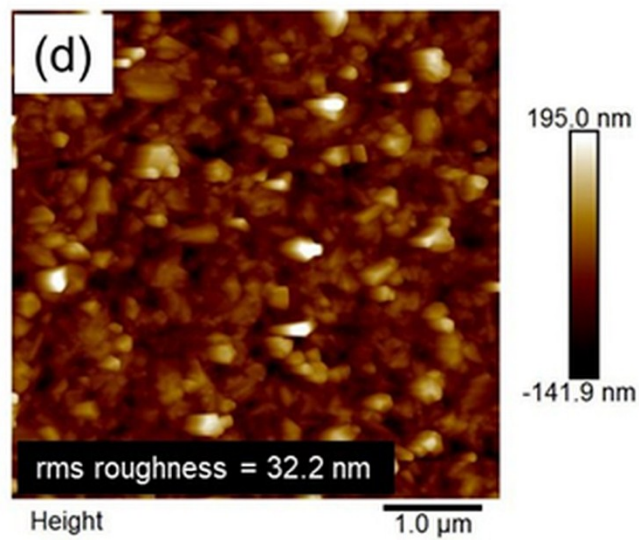

Fig. S3. 3D AFM surface topographies of (a) C0 and (c) C-Na and 2D AFM surface topographies of (b) C0 and (d) C-Na.

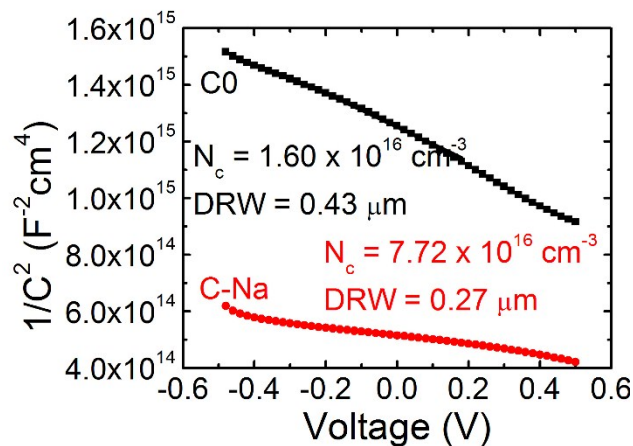

Fig. S4.  $1/C^2$  versus V plot for C0 and C-Na. The measurement was performed with an AC bias and a frequency of 10 mV and 100 kHz, respectively.

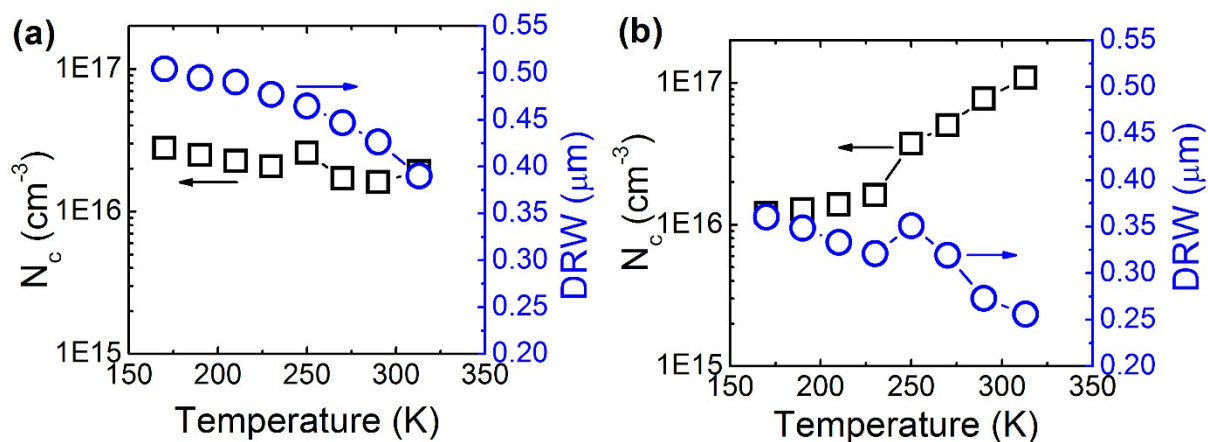

Fig. S5.  $N_c$  and  $DRW$  plots versus T from 313 to 170 K for (a) C0 and (b) C-Na.  $p$  and  $DRW$  values from the relevant CV data.

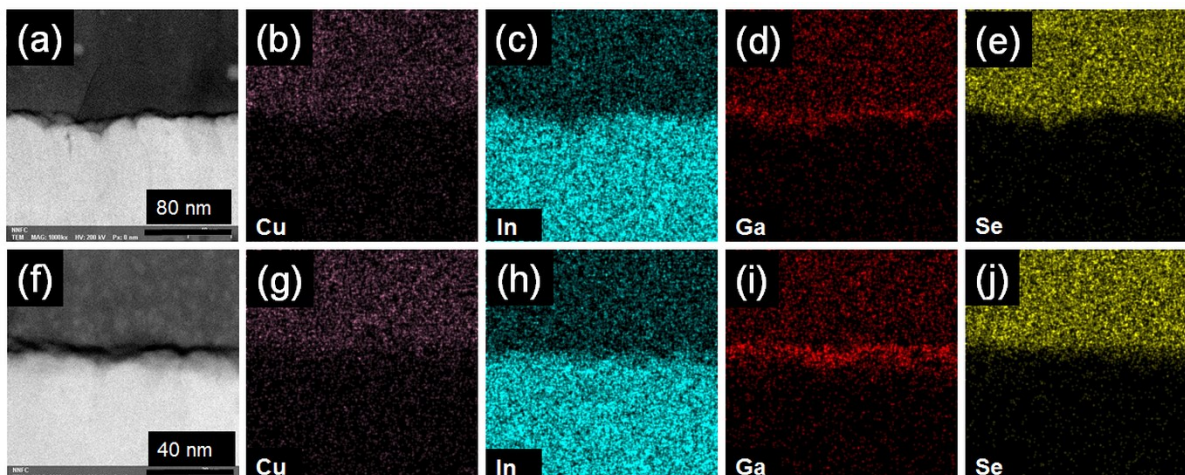

Fig. S6. TEM cross-sectional images of (a) C0 and (f) C-Na and the corresponding TEM-EDS elemental maps for (b) Cu in C0, (g) Cu in C-Na, (c) In in C0, (h) In in C-Na, (d) Ga in C0, (i) Ga in C-Na, (e) Se in C0 and (j) Se in C-Na.

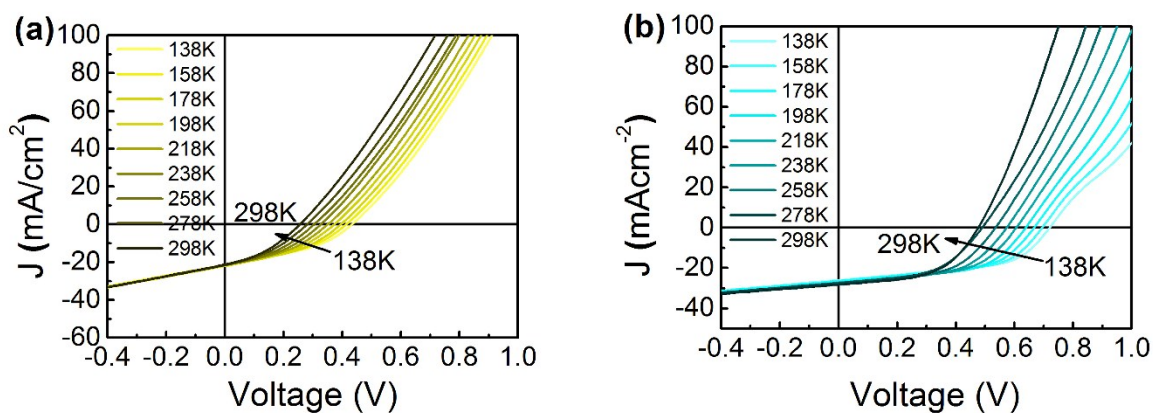

Fig. S7. T-dependent light-JV data of (a) C0 and (b) C-Na from 138 to 298 K under neutral white light illumination.

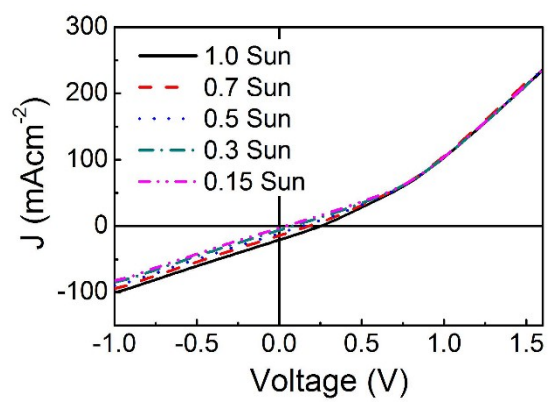

Fig. S8. Light intensity-dependent JV curves for C0.
